# Supplementary material for: A ratiometric electrochemical strategy based on Fe (iii) and Pt (iv) for immobilization-free detection of Escherichia coli
Source: Royal Society of Chemistry journal article supplement (doi:10.1039/d2ay00628f), 2022-01-01
Supplement: d2ay00628f1.pdf [file d2ay00628f1.pdf]

## **Electronic Supplementary Material**

### **A ratiometric electrochemical strategy based on Fe (III) and Pt (IV) for immobilization-free detection of Escherichia coli**

Lixia Su, Yonghuan Su, Bingqian Liu\*

Synthetic Pharmaceutical Engineering Laboratory of Guizhou Province, School of Pharmacy, Guizhou University, Guiyang 550025, China.

## Synthesis of Magnetic CuFe<sub>2</sub>O<sub>4</sub> Nanoparticles

Magnetic CuFe<sub>2</sub>O<sub>4</sub> nanoparticles were prepared by a facile solvothermal method <sup>[1]</sup>. Briefly, NaAc (0.36 g), FeCl<sub>3</sub>·6H<sub>2</sub>O (0.135 g, 0.5 mmol), and CuCl<sub>2</sub>·2H<sub>2</sub>O (0.0425 g, 0.25 mmol) were completely dissolved in ethylene glycol (EG, 5.0 mL) via ultrasonication for 40 min. Then, the obtained homogeneous mixture solution was transferred into a Teflon-lined stainless-steel autoclave and sealed to heat at 200°C for 8h. After the reaction, the magnetic CuFe<sub>2</sub>O<sub>4</sub> nanoparticles were obtained with the help of a magnet, rinsed with ultrapure water and ethanol several times, and finally dried for later use.

## Synthesis of CuFe<sub>2</sub>O<sub>4</sub>/GO composite

The CuFe<sub>2</sub>O<sub>4</sub>/GO nanocomposite was prepared by a versatile self-assembly approach <sup>[2]</sup>. Briefly, 1 mg/mL of GO was dispersed in deionized water and sonicated for 2 h to form a brown GO aqueous solution for later use. And as-prepared CuFe<sub>2</sub>O<sub>4</sub> nanoparticles were dispersed in deionized water with sonication for 1 h to be a homogeneously dispersed suspension with a concentration of about 2 mg/mL, and the pH value of this suspension was adjusted to four using 0.1 mol L<sup>-1</sup> HCl solution. Subsequently, the resulting GO aqueous solution was then added to the above suspension dropwise and the mixed solution was sonicated for another 2 h. Finally, the obtained CuFe<sub>2</sub>O<sub>4</sub>/GO nanocomposite was centrifuged, washed, and dried.

## Synthesis of PANI/CuFe<sub>2</sub>O<sub>4</sub>/GO composite

As far as we know, there are no reports on the synthesis of PANI/CuFe<sub>2</sub>O<sub>4</sub>/GO nanocomposites. So we prepared the PANI/CuFe<sub>2</sub>O<sub>4</sub>/GO composite by the synthesis method of PANI/CuFe<sub>2</sub>O<sub>4</sub> by Hassan et al <sup>[3]</sup> and modified slightly. The polyaniline copper ferrite nano-composite was prepared using chemical polymerization method by dispersing 0.2 g of the previously prepared CuFe<sub>2</sub>O<sub>4</sub>/GO composite in 20 mL of 2M HCl and stirred vigorously at room temperature for 10 min. 1.25 mL aliquot of distilled aniline monomer was added under continuous stirring for 30 min. To the above suspension, 5 mL of 19.7 mmol (NH<sub>4</sub>)<sub>2</sub>S<sub>2</sub>O<sub>8</sub> was added drop-wisely, as a polymerization initiator. An immediate color change of the solution to blue green was observed. The suspension was stirred to complete the polymerization process for about 1 h. The composite was separated by magnet, rinsed with distilled water, and finally dried at 100 °C.

## Synthesis of Au NPs

The Au NPs were synthesized according to Ma's method <sup>[4]</sup> in short one milliliter of chloroauric acid solution (1 wt %) was added into deionized water to dilute to 100 mL and heated with stirring. After boiling, a sodium citrate solution (1 wt %, 2.5 mL) was added dropwise into the diluted solution. The solution was continuously heated for 5 min until it turned wine red. The solution was then transferred to a 4°C environment for storage.

## Bacteria culture and preparation

*E. coli* strain (DH 5α, provided by Zhenglin Gao, 402 Biological Laboratory, College of Pharmacy, Guizhou University) were cultured in broth culture medium (Luria-Bertani (LB) medium including Tryptone, Yeast, NaCl, Ph=7) until an optical density between 1.0 and 1.3 was obtained. Growth medium was got rid of by centrifugation (3000 rpm, 15 min) and resuspension in PBS (KH<sub>2</sub>PO<sub>4</sub>, Na<sub>2</sub>HPO<sub>4</sub>, NaCl; 0.1 M, pH 7.4). The number of bacteria in solution was determined by optical density (OD) at a wavelength of 600 nm, OD<sub>600</sub> value of 1.0 is corresponding to the bacteria concentration of 8×10<sup>8</sup> colony forming units (cfu/mL), and the *E. coli* solution was diluted 10 times, 100 times and so on <sup>[5]</sup>. *S. aureus*, *B. subtilis*, *E. coli* strains were cultured with the same method as above (provided by Lei Wang, 404 Biological Laboratory, College of Pharmacy, Guizhou University)

## Characteristics of the Prepared Nanomaterials

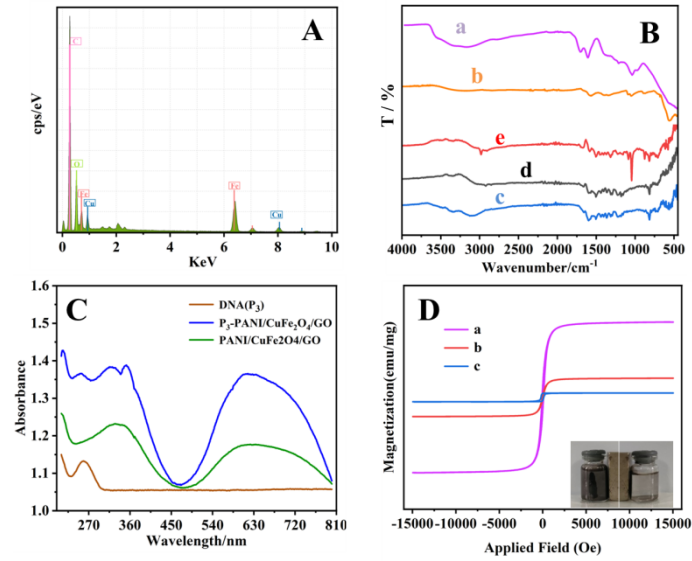

Fig. S1 EDS spectrum of  $\text{CuFe}_2\text{O}_4$  (A), FT-IR spectroscopy of composites (B): (a) GO, (b)  $\text{CuFe}_2\text{O}_4$ , (c)  $\text{CuFe}_2\text{O}_4/\text{GO}$ , (d)  $\text{PANI}/\text{CuFe}_2\text{O}_4/\text{GO}$ , (e)  $\text{NH}_2\text{-PANI}/\text{CuFe}_2\text{O}_4/\text{GO}$ . UV-vis absorption spectra of composites (C), Magnetization hysteresis loops of composites (D): (a)  $\text{CuFe}_2\text{O}_4$ , (b)  $\text{CuFe}_2\text{O}_4/\text{GO}$ , (c)  $\text{PANI}/\text{CuFe}_2\text{O}_4/\text{GO}$ .

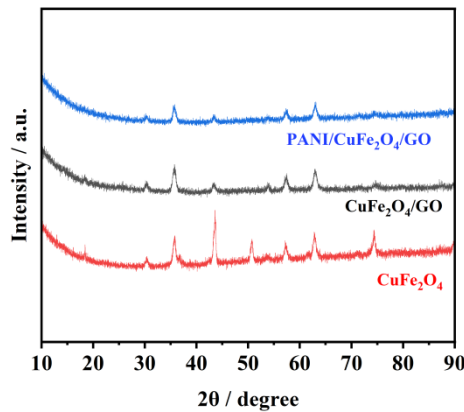

Fig. S2 XRD pattern of  $\text{CuFe}_2\text{O}_4$ ,  $\text{CuFe}_2\text{O}_4/\text{GO}$ ,  $\text{PANI}/\text{CuFe}_2\text{O}_4/\text{GO}$ .

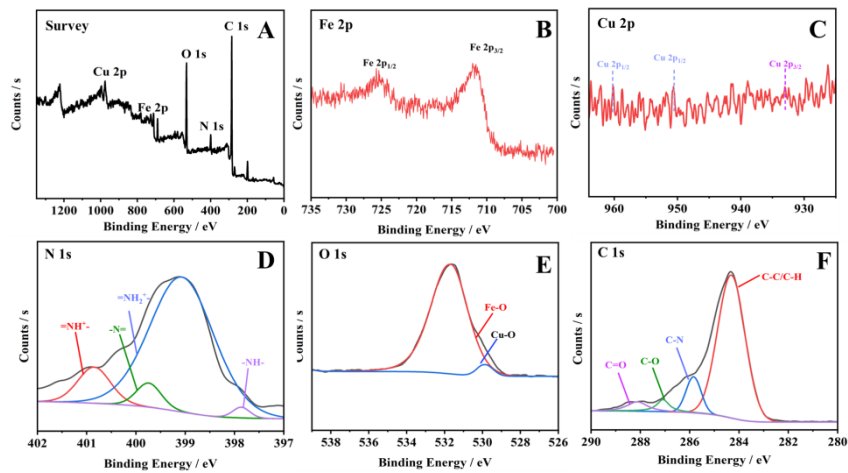

Fig. S3 XPS spectra of  $\text{PANI}/\text{CuFe}_2\text{O}_4/\text{GO}$  composite: survey spectrum (A), Fe 2p spectrum (B), Cu 2p spectrum (C), N 1s spectrum (D), O 1s spectrum (E) and C 1s spectrum (F).

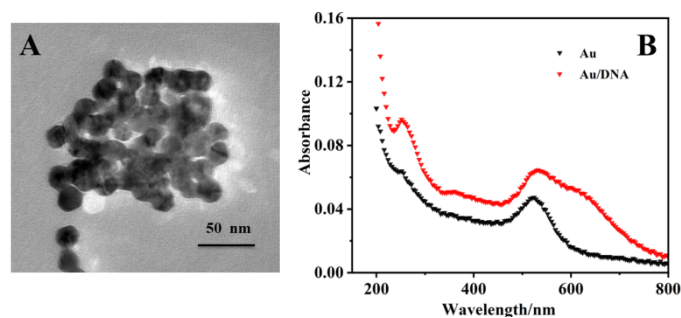

Fig. S4 TEM images of Au NPs (A), UV-vis absorption spectra of Au NPs and tDNA/Au.

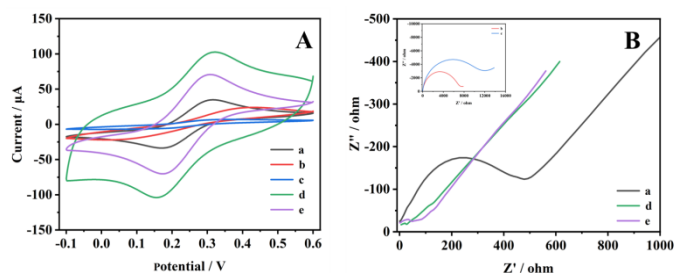

Fig. S5 (A) The CV curves of different modified electrodes in 5 mM  $[\text{Fe}(\text{CN})_6]^{3-/4-}$  solution containing 0.1 M KCl (scanning rate: 50 mV/s): (a) bare GCE; (b)  $\text{CuFe}_2\text{O}_4/\text{GCE}$ ; (c)  $\text{GCE}+\text{CuFe}_2\text{O}_4/\text{GO}$ ; (d)  $\text{GCE}+\text{CuFe}_2\text{O}_4/\text{GO-PANI}$ ; (e)  $\text{cDNA-PANI}/\text{CuFe}_2\text{O}_4/\text{GO}$ . (B) EIS curves (Nyquist) of work electrode modified with different materials in 5 mM  $[\text{Fe}(\text{CN})_6]^{3-/4-}$  solution containing 0.1 M KCl: a) bare GCE; (b)  $\text{CuFe}_2\text{O}_4/\text{GCE}$ ; (c)  $\text{GCE}+\text{CuFe}_2\text{O}_4/\text{GO}$ ; (d)  $\text{GCE}+\text{CuFe}_2\text{O}_4/\text{GO-PANI}$ ; (e)  $\text{cDNA-PANI}/\text{CuFe}_2\text{O}_4/\text{GO}$ .

## Feasibility of the Designed Strategy

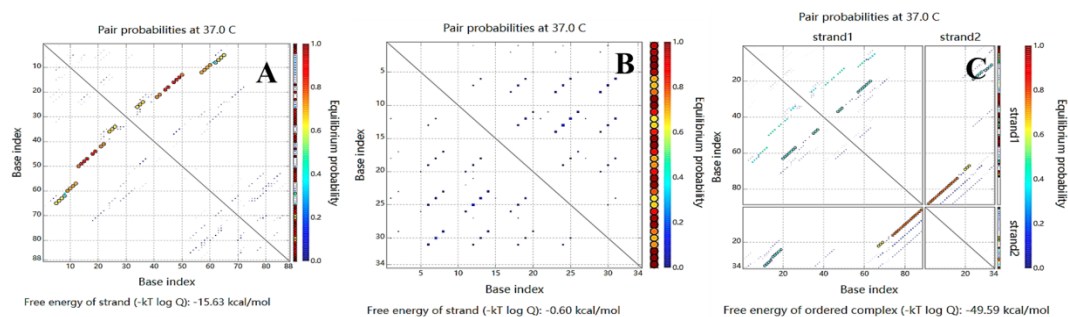

Fig. S6 NUPACK analysis of binding of DNA strands: (A) aDNA, (B) tDNA and (C) binding of aDNA and tDNA.

## Optimization of the Experimental Conditions

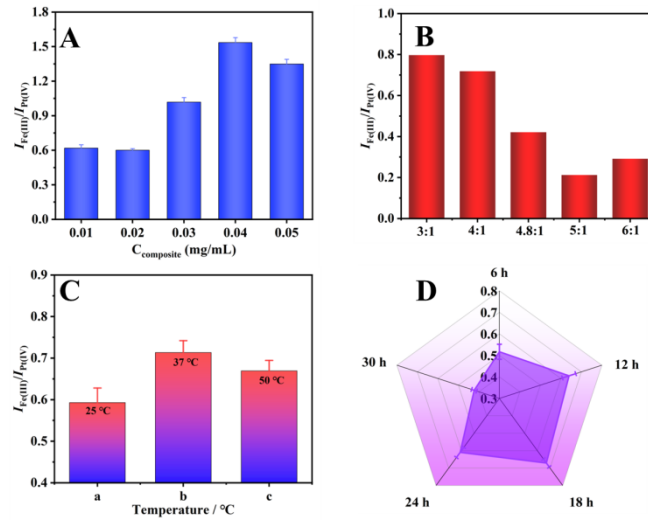

Fig. S7 Optimization of the experimental conditions: the amount of cDNA-PANI/CuFe<sub>2</sub>O<sub>4</sub>/GO composite (A), the different ratios of Pt (IV) and Fe (III) (B), the reaction temperature (C) and the adsorption time of DNA/Au NPs for Pt (IV) (D).

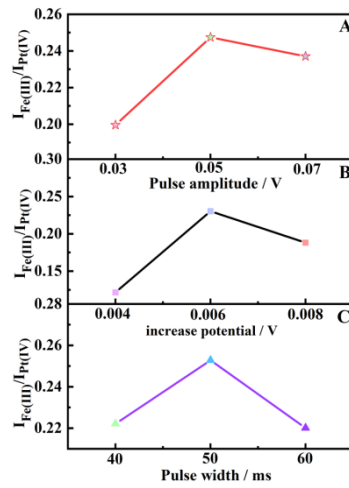

Fig. S8 DPV measurements optimization: pulse amplitude (A), increase potential (B), pulse width (C).

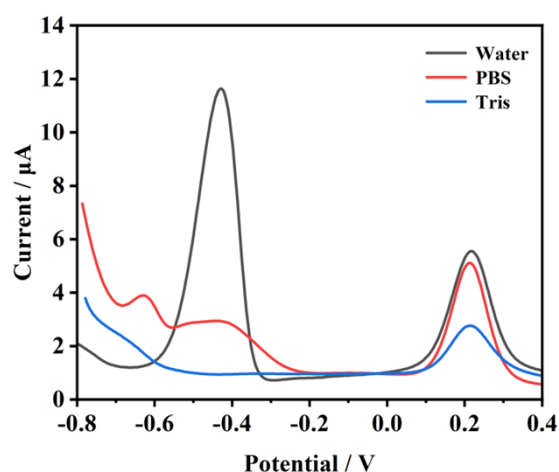

Fig. S9 DPV signal response of different solution.

### Real Samples Analysis

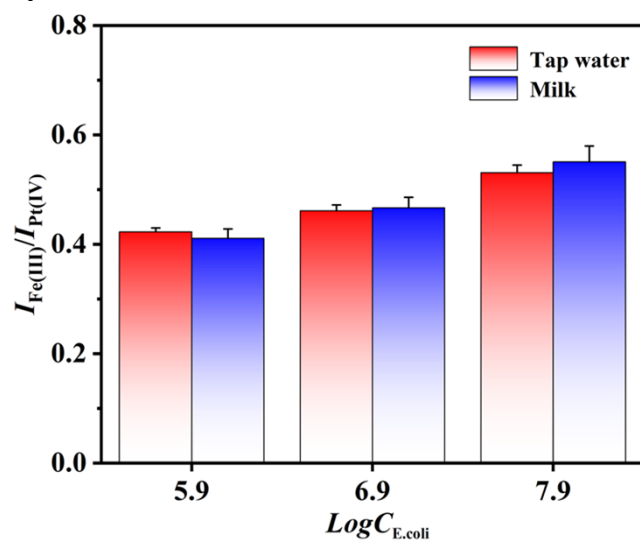

Fig. S10 The DPV response obtained for milk samples spiked with DH 5α.

**Table S1** Oligonucleotide sequences used in this work

| Oligo Name | Sequence (from 5' to 3')                                                                  |
|------------|-------------------------------------------------------------------------------------------|
| cDNA       | COOH-<br>ATCCGTCACACCTGCTCTATCAAATGTGCAGATATCAAGACGATTTGTACAAGATGGTGTGGCTC<br>CCGTAT      |
| aDNA       | ATCCGTCACACCTGCTCTACGGCGCTCCCAACAGGCCTCTCCTTACGCATATTATGGTGTGGCTC<br>CCGTATCCCTAACCTAACCC |
| tDNA       | SH-AGGGTTAGGGTTAGGGTTAGGGTTAGGGTTAGGG                                                     |

**Table S2** Analytical performances of various methods towards E. coli

| Assay            | Linear range                                | Detection limit              | Materials                                                          | Reference |
|------------------|---------------------------------------------|------------------------------|--------------------------------------------------------------------|-----------|
| Electrochemistry | 1- 4×10 <sup>4</sup> cfu/mL                 | 1 cfu/mL                     | Nitrocellulose-modified Gr electrodes                              | [6]       |
| Electrochemistry | 10 <sup>6</sup> -10 <sup>8</sup> cfu/mL     | 10 <sup>5</sup> cfu/mL       | Au/FTO                                                             | [7]       |
| Electrochemistry | 10-10 <sup>8</sup> cells/mL                 | 1 cell/mL                    | RS-PVA gel, Label-free                                             | [8]       |
| Electrochemistry | 1-1×10 <sup>3</sup> cfu/mL                  | 27 cfu/mL                    | Amine modified thermoplastic electrodes                            | [9]       |
| Electrochemistry | 10 <sup>3</sup> -10 <sup>6</sup> cfu/mL     | 10 <sup>3</sup> cfu/mL       | Antibody immobilized on gold electrodes                            | [10]      |
| Electrochemistry | 8×10 <sup>3</sup> -8×10 <sup>8</sup> cfu/mL | 1.862×10 <sup>3</sup> cfu/mL | DNA/PANI/CuFe <sub>2</sub> O <sub>4</sub> /GO, immobilization-free | This work |

## References

- [1] J. Li, H. Jiang, X. Rao, Z. Liu, H. Zhu and Y. Xu, *Analytical Chemistry*, 2019, **91**, 1494–1500.
- [2] B. Liu, W. Wang, J. Wang, Y. Zhang, K. Xu and F. Zhao, *Journal of Nanoparticle Research*, 2019, **21**, 48.
- [3] S. Hassan, A. H. Kamel, A. A. Hassan, A. Amr, H. A. El-Naby, M. Al-Omar and A. Sayed, *Molecules*, 2020, **25**, 2721.
- [4] N. Ma, X. Ren, H. Wang, X. Kuang, D. Fan, D. Wu and Q. Wei, *Analytical Chemistry*, 2020, **92**, 14069–14075.
- [5] R. A. S. Couto, L. Chen, S. Kuss and R. G. Compton, *Analyst*, 2018, **143**, 4840-4843.
- [6] P. Dmitrii, B. Mads, S. Stepan, G. Ulrich and F. E. Elena, *Analytical Chemistry*, 2020, **92**, 12451–12459.
- [7] P. li, X. Wang, W. Gao, W. yan, Y. Ma, W. Guan, Y. Yu, F. Ji, S. Wu and K. Ding, *Analyst*, 2018, **143**, 1462-1467.
- [8] L. D. Chakkarapani, H. Girault and M. Jović, *Bioelectrochemistry*, 2021, doi: 10.1016/j.bioelechem.2021.107836.
- [9] O. Tugba, M. Cynthia, Brian J. Geiss, D. David and Charles S. Henry, *Journal of The Electrochemical Society*, 2021, **168**, 047509.
- [10] P. Skládal, E. Švábenská, J. Žeravík, J. Příbyl, P. Šišková, T. Tjærnhage and I. Gustafson, *Electroanalysis*, 2012, **24**, 539– 546.
